# Supplementary material
Source: PubMed Central journal article supplement (PMC3489145)
Supplement: supp_mcs131_mcs131suppl.pdf [file supp_mcs131_mcs131suppl.pdf]

## SUPPLEMENTARY DATA

TABLE S1. Binning applied to alleles of different *Campanula thyrsoides* microsatellite loci (Ægisdóttir *et al.* 2007). Allele codes indicate their lengths in base-pairs.

| Locus    | Alleles binned     |
|----------|--------------------|
| Camphy1  | 160; 162           |
| Camphy3  | 127; 129; 131      |
| Camphy3  | 147; 150; 153; 155 |
| Camphy5  | 111; 113; 115      |
| Camphy5  | 117; 120; 123      |
| Camphy6  | 151; 153           |
| Camphy6  | 161; 163; 165      |
| Camphy6  | 167; 170           |
| Camphy9  | 161; 163           |
| Camphy9  | 184; 186           |
| Camphy15 | 172; 174           |
| Camphy15 | 176; 178           |

Ægisdóttir HH, Koller B, Kuss P, Stöcklin J. 2007. Development and characterization of microsatellite DNA markers for the Alpine plant species *Campanula thyrsoides*. *Molecular Ecology Notes* 7: 996–997.
